## Mini-Review

# New Horizons. A New Paradigm for Treating to Target with Second-Generation Obesity Medications

W. Timothy Garvey<sup>1</sup>

<sup>1</sup>Department of Nutrition Sciences, University of Alabama at Birmingham, Birmingham, AL, USA

ORCID number: [0000-0003-0822-0860](https://orcid.org/0000-0003-0822-0860) (W. Timothy Garvey).

**Abbreviations:** AACE, American Association of Clinical Endocrinology; ABCD, adiposity-based chronic disease; BMI, body mass index; CNS, central nervous system; CVD, cardiovascular disease; ER, extended release; FDA, US Food and Drug Administration; GIP, gastric inhibitory polypeptide; GLP-1, glucagon-like peptide 1; LDL-c, low density lipoprotein cholesterol; PYY, peptide YY; RCT, randomized clinical trial; SELECT, semaglutide effects on heart disease and stroke in patients with overweight or obesity trial; STEP, semaglutide treatment effect in people with obesity program; T2D, type 2 diabetes mellitus.

Received: 6 October 2021; Editorial Decision: 17 November 2021; First Published Online: 5 December 2021; Corrected and Typeset: 12 December 2021.

## Abstract

In treating obesity as a chronic disease, the essential goal of weight loss therapy is not the quantity of weight loss as an end unto itself but rather the prevention and treatment of complications to enhance health and mitigate morbidity and mortality. This perspective on obesity care is consistent with the complications-centric American Association of Clinical Endocrinology (AACE) obesity guidelines and the diagnostic term of adiposity-based chronic disease (ABCD). Many complications require 10% to 20% weight loss to achieve therapeutic goals; however, existing obesity medications fail to produce  $\geq 10\%$  weight loss in the majority of patients. In June, 2021, semaglutide 2.4 mg/week was approved for chronic weight management. Phase 3 clinical trials demonstrated that this medication produced  $> 10\%$  placebo-subtracted weight loss, more than half of patients lost  $\geq 15\%$ , and over one third lost  $\geq 20\%$  of baseline weight. This essentially doubles effectiveness over existing obesity medications, provides sufficient weight loss to ameliorate a broad range of complications, and qualifies as the first member of a second-generation class of obesity medications. The advent of second-generation medications fully enables a treat-to-target approach for management of ABCD as a chronic disease. Specifically, with this degree of efficacy, second-generation medications permit active management of body weight as a biomarker to targets associated with effective treatment and prevention of specific complications. ABCD can now be managed similar to other chronic diseases such as type 2 diabetes, hypertension, and atherosclerosis, which are treated to biomarker targets that can be modified based on the clinical status of individual patients

[ie, hemoglobin A1c (HbA1c), blood pressure, and low-density lipoprotein cholesterol (LDL-c)] to prevent the respective complications of these diseases.

**Key Words:** obesity, anti-obesity medications, obesity complications, chronic disease

## Introduction: A New Horizon for Obesity Medicine

The advent of a new paradigm in obesity care has transpired due to recent developments in obesity medicine combined with a better understanding of obesity as a chronic disease. At the core of this transformation is the introduction of a medication, with additional drugs under development, having a degree of efficacy and safety that substantially surpasses antecedent therapies. Despite the huge burden of patient suffering and social costs exacted by obesity, the disease is underdiagnosed and there is widespread lack of access to evidence-based therapy (1). In this sense, healthcare systems have failed our patients and our societies. Hopefully, as will be discussed, new therapeutic tools will change the way clinicians approach the disease and enable a new paradigm of care that will more effectively benefit larger numbers of patients.

Three new concepts will be developed. The first pertains to the designation of second-generation medications for the treatment of obesity. In general, a second-generation medication should entail a considerable advance in efficacy and/or safety compared to previous medications for a disease which, in effect, facilitates a significant change in treatment and ability of clinicians to improve patients' health. In addition, the therapeutic effect should be sustained when applied to chronic diseases given their long-term natural history. A definition specific for the pharmacotherapy of obesity will be proposed based on the degree of efficacy required to substantially improve patient outcomes to a degree than can be transformative for obesity care. This will be discussed in the context of a recently approved medication that meets the defined criteria for a second-generation obesity medication together with others in development with this same potential.

The availability of second-generation medications is integrally linked with the second and third concepts that constitute a new paradigm for obesity care. The second concept is the use of % weight loss as a biomarker that can actively be managed within a range associated with optimal outcomes in patients with obesity. In this way, obesity is managed similar to other chronic diseases in which therapeutic efficacy is based on the control of a biomarker [eg, HbA1c in diabetes, blood pressure in hypertension, LDL-c in cardiovascular disease (CVD)] within a range known to be associated with the prevention and treatment of complications. The use of % weight loss as a biomarker is coupled with the third concept which

is a treat-to-target approach for patients with obesity. Obesity is a chronic disease of energy balance driven by dysregulated interactions involving satiety factors and the central nervous system (CNS) resulting in increased caloric intake and an excess in adipose tissue mass (2-4). The increase in adiposity causes chronic complications that confer increased morbidity and mortality. As a chronic disease, treatment improves the health of patients by preventing and treating obesity complications (5,6). As will be discussed, different complications require different amounts of weight loss for prevention and treatment (5). Second-generation medications for the first time allow clinicians to manage % weight loss (ie, the biomarker) into a target range that has been shown to ameliorate specific complications. Depending on the complication profile present in different patients, the target for % weight loss can be individualized. This is in contrast with preexisting medications that often lack the degree of efficacy to optimally address many complications and where the primary focus is on the kilograms of weight loss per se; in other words, treating the biomarker to the extent possible as the end point of therapy without regard to the attendant clinical outcomes of the chronic disease.

## Obesity, Complications, and Adiposity-based Chronic Disease

It has become clear that obesity is a chronic disease (6) that involves more than an increase in body mass. The diagnosis of obesity based on body mass index (BMI; weight in kg/height in m<sup>2</sup>) uses an indirect measure of adiposity that provides no information regarding the impact of excess weight on health (7). As with other chronic diseases, it is the complications of obesity that impair health and confer morbidity and mortality (5,8). The mass of adipose tissue gives rise to biomechanical complications such as obstructive sleep apnea and osteoarthritis while abnormalities in the distribution and function of adipose tissue contribute to cardiometabolic disease complications. Cardiometabolic disease begins with insulin resistance, which is initially subclinical but eventually produces clinical manifestations that include metabolic syndrome, prediabetes, elevated blood pressures, dyslipidemia, and hepatic steatosis. These manifestations indicate risk for progression to the end-stage manifestations of cardiometabolic disease, namely type 2 diabetes (T2D), nonalcoholic steatohepatitis, and CVD. The development of obesity exacerbates insulin resistance

and impels progression of cardiometabolic disease toward these ultimate outcomes (9). In this context, ABCD has been suggested as a more precise clinical and diagnostic term for obesity by the AACE (10) and the European Association for the Study of Obesity (11). ABCD indicates what we are treating—namely, abnormalities in the mass, distribution, and function of adipose tissue—and why we are treating it, a chronic disease that gives rise to complications that require prevention and treatment. Accordingly, the complications-centric AACE clinical guidelines for obesity emphasize the prevention and treatment of complications as the end point of therapy rather than the amount of weight lost per se (5).

While weight loss is highly effective for treating and preventing ABCD complications, the dose-response for weight loss to achieve clinical benefit varies as a function of the various complications (4,5). In patients with ABCD and prediabetes or metabolic syndrome, 10% weight loss is maximally effective for preventing progression to overt diabetes (5,12); in patients with T2D, the more weight loss the better where weight loss of >5% to 15% or more provides progressive improvements in HbA1c, blood pressure, and lipids (13); for obstructive sleep apnea, ≥10% weight loss is needed for predictable improvements in the apnea/hypopnea index; and in nonalcoholic fatty liver disease (14,15), 5% to 10% weight loss will reduce steatosis but >10% weight loss is required in nonalcoholic steatohepatitis to improve inflammation and fibrosis (5,16,17). Prevention of CVD events and mortality may require >10% weight loss based on case-control studies and meta-analyses of the bariatric surgery literature (18–20) and on results from the Look AHEAD study in patients with T2D that assessed outcomes as a function of degree of weight loss (21). Overall, in considering the degree of weight loss required to ameliorate these common complications in ABCD, interventions are needed that reliably produce 10% to 20% weight loss.

## The Evolution and Rationale for Obesity Pharmacotherapy

In the late 1950s and 1960s, sympathomimetic amines (eg, phentermine, benzphetamine, diethylpropion) were approved for short-term weight reduction encompassing a treatment period of a few weeks. Due to a lack of understanding regarding obesity pathophysiology, it was considered that once weight was lost in the short-term there was no need for ongoing treatment. As a consequence, we are lacking long-term safety data on these drugs to this day. Orlistat was approved in 1999 for chronic weight management, which acts intraluminally to impair intestinal fat digestion and absorption. It has since become clear that the excess in adipose tissue mass is the result of abnormalities

in satiety hormones interacting with CNS feeding centers (2–4). Specifically, the interaction of orexigenic hormones such as ghrelin and anorexigenic hormones such as leptin, cholecystokinin, peptide YY (PYY), and amylin with hypothalamic satiety centers is dysregulated resulting in a level of caloric intake that generates and sustains excess adiposity. There are also maladaptive responses following weight loss that are important aspects of obesity pathophysiology. Weight loss resulting from a hypocaloric diet triggers increments in the orexigenic hormone and ghrelin and a decrease in anorexigenic hormones including glucagon-like peptide 1 (GLP-1), amylin, cholecystokinin, and PYY. This results in greater hunger and increased caloric intake. In addition, there is a reduction in energy expenditure that contributes to positive energy balance. These maladaptive responses work against the patient, promote weight regain back to the previous high level of adiposity, and explain why weight loss is often not sustained with lifestyle interventions. In this sense, obesity protects obesity as a function of disease pathophysiology.

Medications were needed for chronic administration that could blunt appetite by counteracting abnormalities in the satiety hormone-CNS axis. Three such medicines approved by the FDA, fenfluramine, sibutramine, and lorcaserin have been discontinued due to safety concerns. However, from 2012 to 2014, 3 centrally acting medicines were approved for chronic weight management that continue to be available to clinicians, phentermine/topiramate extended release (ER; a sympathomimetic amine combined with a gabaminergic drug used for epilepsy), naltrexone ER/bupropion ER (an opioid receptor antagonist combined with a dopamine/norepinephrine reuptake inhibitor used for depression), and liraglutide 3 mg/day (a GLP-1 receptor agonist) (5). All met the FDA criteria for efficacy in phase 3 randomized clinical trials (RCTs); mean placebo-subtracted weight loss was ≥5% or the proportion of patients who lost ≥5% body weight was ≥35% and double that observed in the placebo group. In June, 2021, the FDA approved another GLP-1 receptor agonist, semaglutide 2.4 mg subcutaneously once a week, for chronic weight management. This medication essentially doubled the weight loss observed in phase 3 RCTs compared with corresponding data for preexisting obesity medications (22–24). A case will be made that the availability of a medication with this degree of efficacy constitutes a “new horizon” in the care of patients with obesity.

## A Second-generation Obesity Medication

A second-generation medication should generally entail a considerable advance in efficacy and/or safety and facilitate a significant change in treatment. While real-world

experience is critical in qualifying a medication as second generation, these qualities can more immediately and rigorously be ascertained based on RCTs. As previously discussed, an obesity medication that safely achieves 10% to 20% weight loss in the majority of patients would constitute a powerful therapeutic option given the relationship between weight loss and clinical benefits pertaining to ABCD complications.

Prior to approval of semaglutide 2.4 mg, all medications available to clinicians (orlistat, phentermine/topiramate ER, naltrexone ER/bupropion ER, and liraglutide 3 mg) resulted in <10% mean placebo-subtracted weight loss

at 1 year, as shown in Table 1. With respect to categorical weight loss, the percentage of subjects losing  $\geq 10\%$  of baseline weight was far less than 50% and many fewer lost  $\geq 15\%$ . Clearly, these medications were not ideal and could not optimally be used to effectively manage complications in many patients. In essence, clinicians and patients had to be satisfied with the weight loss and health benefits achieved with these medications since they did not enable a robust ability to actively manage patients toward treatment goals. With this in mind, the qualities delineated in Box 1 would characterize a medication with the capacity to transfigure obesity care and would provide clinicians with the tools to substantially and predictably enhance health in the majority of patients.

Semaglutide 2.4 meets these qualifications as the first example of a second-generation medication for general treatment of obesity based on (i) its superior efficacy compared to previously approved medications for chronic weight management and (ii) the health benefits associated with this degree of weight loss regarding the treatment of ABCD complications. Key phase 3 RCTs assessing efficacy and safety of semaglutide 2.4 mg (the STEP trials) were published in leading journals in 2021 (22-24). Across STEP trials, mean placebo-subtracted weight loss was

**Box 1.** Definition of a Second-generation Obesity Medication

- Ability to safely produce an average of >10% placebo-subtracted weight loss in randomized clinical trials (ie, over that attributable to lifestyle interventions) in the majority of patients or
- Ability to safely produce a  $\geq 15\%$  weight loss in over half the patients as an adjunct to lifestyle.

**Table 1.** Efficacy of obesity medications in randomized clinical trials

| Drug                                           | % Weight loss |         | % with $\geq 10\%$ |         | % with $\geq 15\%$ |         | % with $\geq 20\%$ |         |
|------------------------------------------------|---------------|---------|--------------------|---------|--------------------|---------|--------------------|---------|
|                                                | Drug          | Placebo | Drug               | Placebo | Drug               | Placebo | Drug               | Placebo |
| Orlistat (ref 25)                              |               |         |                    |         |                    |         |                    |         |
| XENDOS 1 year                                  | 10.6          | 6.2     | 41                 | 20.8    |                    |         |                    |         |
| XENDOS 4 year                                  | 5.8           | 3.0     | 26.2               | 15.6    |                    |         |                    |         |
| Phentermine/topiramate ER <sup>a</sup> (26-28) |               |         |                    |         |                    |         |                    |         |
| EQUIP                                          | 10.9          | 1.6     | 47.2               | 7.4     | 32.3               | 3.4     |                    |         |
| CONQUER                                        | 9.8           | 1.2     | 37.0               | 7.0     |                    |         |                    |         |
| SEQUEL 2 yr                                    | 9.3           | 1.8     | 50.3               | 11.5    | 24.2               | 6.6     | 9.2                | 2.2     |
| Naltrexone ER/bupropion ER (29-31)             |               |         |                    |         |                    |         |                    |         |
| COR-I                                          | 6.1           | 1.3     | 25.0               | 7.0     | 12                 | 2       |                    |         |
| COR-II                                         | 6.4           | 1.2     | 28.3               | 5.7     | 13.5               | 2.4     |                    |         |
| COR-BMOD                                       | 9.3           | 5.1     | 41.5               | 20.2    | 29.1               | 10.9    |                    |         |
| Liraglutide 3 mg (32-34)                       |               |         |                    |         |                    |         |                    |         |
| SCALE Maintenance                              | 6.7           | 0.1     | 26.1               | 6.3     | 11.0               | 3.1     |                    |         |
| SCALE Ob & PreDM 1 year                        | 9.2           | 3.5     | 33.1               | 10.6    | 14.4               | 3.5     |                    |         |
| SCALE Ob & PreDM 3 year                        | 7.1           | 2.7     | 24.8               | 9.9     | 11.0               | 3.1     |                    |         |
| Semaglutide 2.4 mg (22-24,35,36)               |               |         |                    |         |                    |         |                    |         |
| STEP 1                                         | 14.8          | 2.4     | 69.1               | 12.0    | 50.5               | 4.9     | 32.0               | 1.7     |
| STEP 3                                         | 16.0          | 5.7     | 75.3               | 27.0    | 55.8               | 13.2    | 35.7               | 3.7     |
| STEP 4                                         | 17.4          | 5.0     | 79.0               | 20.4    | 63.7               | 9.2     | 39.6               | 4.8     |
| STEP 5 2 year                                  | 15.2          | 2.6     | 61.6               | 13.3    | 52.1               | 7.0     | 36.1               | 2.8     |
| STEP 8                                         | 15.8          | 1.9     | 70.9               | 15.4    | 55.6               | 6.4     | 38.5               | 2.6     |

All data represents primary analyses for each study [eg, intention to treat (ITT), ITT/last observation carried forward (LOCF), LOCF with imputation, treatment policy estimand].

Abbreviations: % with  $\geq$ , % = % of subjects achieving  $\geq 10\%$ ,  $\geq 15\%$ , and  $\geq 20\%$  weight loss from baseline; Ob, obesity; PreDM, prediabetes.

<sup>a</sup>Dose is phentermine 7.5 mg/topiramate 46 mg except 15 mg/92 mg in EQUIP.

consistently >10%, averaging 12.3%, and consistently more than half of patients lost ≥15% of baseline weight and over a third lost ≥20% (Table 1). The safety profile of semaglutide 2.4 mg was not different from other GLP-1 receptor agonists in that the main adverse events were gastrointestinal, in particular, nausea experienced early during dose escalation, which was usually mild to moderate and improved over time. A second potential example of a second-generation medication is setmelanotide approved by the FDA in November 2020. However, this melanocortin receptor agonist is currently only approved for use in three rare genetic conditions involving mutations in the pro-opiomelanocortin, proprotein subtilisin/kexin type 1, and leptin receptor genes (37,38) and does not appear to be highly effective in non-monogenic obesity (39).

### The Capacity to Treat ABCD to Target and the Use of % Weight Loss as a Biomarker

A medication with the efficacy of semaglutide 2.4 mg allows for a treat-to-target approach that is routinely employed in the management of other chronic diseases. In T2D, hypertension, and atherosclerosis, treatment is directed at a biomarker, not because the biomarker itself is of primary importance, but because the complications of the disease can effectively be mitigated if the biomarker is managed within a target range. Examples are shown in Figure 1. In diabetes, for example, clinicians treat the biomarker HbA1c to a target of ≤7.0% (40) or ≤6.5% (41) because evidence indicates this will minimize vascular complications such as retinopathy, neuropathy, chronic kidney disease, and CVD risk. The disease of hypertension involves control of blood pressure levels. However, the reduction in mmHg is not an end unto itself; rather, the goal is to prevent complications such as congestive heart failure, stroke, and chronic kidney disease. Finally, to prevent and treat

CVD, LDL-c serves as a biomarker that is managed to a level based on patient risk estimates (42). In each instance, treatment to target for each biomarker (HbA1c, blood pressure, and LDL-c) is individualized based on an individual patient’s overall risk, other comorbid conditions, and status regarding the natural history of the disease.

Similarly, in ABCD, the efficacy afforded by second-generation obesity medications allows clinicians to use % weight loss as a biomarker to indicate whether treatment is sufficient to prevent and treat specific complications. Thus, the amount of weight loss is not of isolated importance or a goal unto itself but is used to determine whether the intensity of therapy is sufficient to ameliorate complications present in individual patients. Percentage weight loss is a more appropriate biomarker than body weight or BMI since any given value provides similar benefits with respect to complications over a wide range of BMI even though patients with a high baseline BMI will lose more kilograms of weight than those with a lower baseline BMI (5). Figure 2 illustrates the variable range of weight loss necessary for treating specific cardiometabolic and biomechanical complications. The shaded area represents the 10% to 20% weight loss that is observed in the clear majority of patients using semaglutide 2.4 mg, which was not achievable with preexisting first-generation obesity medications. Thus, second-generation medications will allow clinicians to reach targets of weight loss that will predictably treat or prevent a broad spectrum of complications in ABCD. As with other chronic diseases, the management of the biomarker (% weight loss) is individualized based on what is needed to treat specific complications present in each patient (5). Semaglutide 2.4 mg also begins to close the gap in weight loss achieved with medications vs bariatric surgery procedures, and indeed the ≥20% weight loss observed in over a third of patients with semaglutide 2.4 mg overlaps with that following adjustable gastric band, gastric sleeve,

|                   | T2D                               | Hypertension     | CVD                    | ABCD/obesity                                                     |
|-------------------|-----------------------------------|------------------|------------------------|------------------------------------------------------------------|
| Biomarker target  | HbA <sub>1c</sub>                 | Blood pressure   | LDL cholesterol        | % weight loss                                                    |
| Reason for target | Prevent complications             |                  |                        |                                                                  |
| Complications     | CKD, retinopathy, neuropathy, CVD | CHF, stroke, CKD | MI, stroke, amputation | T2D, HTN, NAFLD/NASH, CVD risk, CKD, sleep apnea, osteoarthritis |

**Figure 1.** Treating chronic diseases to target. Abbreviations: ABCD: adiposity-based chronic disease; CHF: congestive heart failure; CKD: chronic kidney disease; CVD: cardiovascular disease; HTN: hypertension; LDL: low-density lipoprotein; MI: myocardial infarction; NAFLD: non-alcoholic fatty liver disease; NASH, non-alcoholic steatohepatitis.



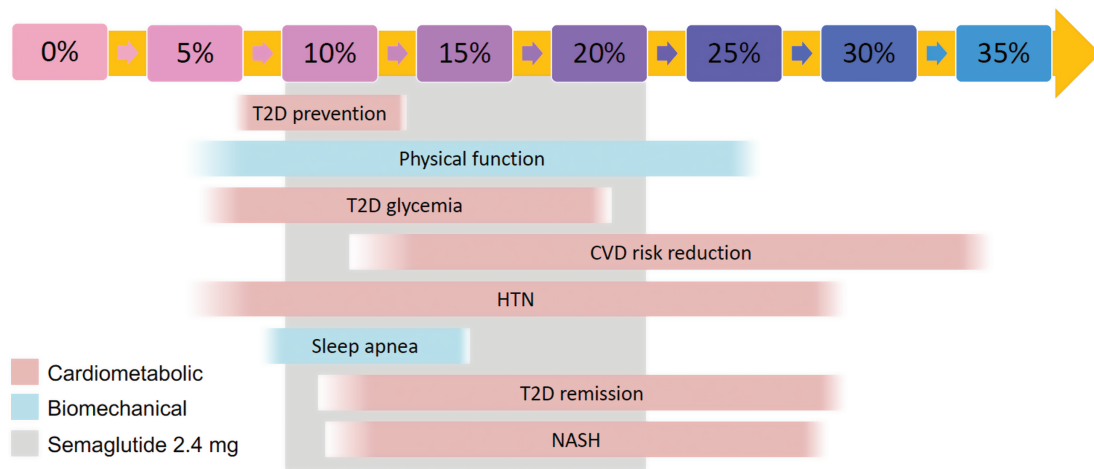

**Figure 2.** Treating ABCD/obesity to target for prevention and treatment of complications. Abbreviations: ABCD: adiposity-based chronic disease; CVD: cardiovascular disease; HTN: hypertension; NASH, nonalcoholic steatohepatitis; T2D, type 2 diabetes.

and gastric bypass procedures. This raises the question as to whether semaglutide will also reduce CVD events and mortality as has been observed following bariatric surgery (18-20). In fact, lower doses of subcutaneous liraglutide (43) and semaglutide (44) produced lesser degrees of weight loss yet were shown to be cardioprotective in patients with T2D. The ongoing SELECT trial is a cardiovascular outcome trial powered for superiority in patients with obesity but without diabetes and will hopefully address this question in ABCD (45).

This paradigm of care is fully consistent with risk stratification and staging of obesity. Several approaches have been proposed for the general staging of patients with obesity such as the Edmonton protocol (46) and the AACE obesity guidelines (5), and cardiometabolic disease staging (47,48) helps clinicians stratify patients over a broad range of risk for progression to T2D and CVD. The AACE guidelines simply stratify patients as stage 0 in the absence of complications, stage 1 if there are 1 or more complications that are mild-moderate in severity, and stage 2 if there is at least 1 severe complication (5). The target for weight varies based on the presence of specific complications as well as the severity of those complications so that more aggressive therapies can be used to achieve therapeutic targets in patients with higher risk or more severe complication profiles. ABCD/obesity is a highly prevalent disease and aggressive therapy is not safe or feasible in all patients. Treatment decisions based on disease staging and individualized treatment-to-target would predictably enhance the benefit-risk ratio and cost effectiveness of interventions. The presence of second-generation medications adds to the value and purpose of disease staging by enabling active management based on severity and individualized targets for weight loss. Finally,

there have been proposals to reform the inadequate International Classification of Diseases 10 coding system for obesity (49-50). The proposed coding approaches are medically actionable and encode degrees of disease severity based on the presence and severity of complications (49), as exists in International Classification of Diseases 10 codes for other chronic diseases. Again, second-generation medications like semaglutide 2.4 mg permit more effective management of ABCD within the context of these new proposed classification approaches.

### Additional Second-generation Medications

While semaglutide 2.4 mg is the first second-generation medication for general treatment of obesity, it is not likely to be the last. Other medications are under development that appear to have these qualities in early phase trials. For example, tirzepatide, a dual gastric inhibitory polypeptide (GIP) and GLP-1 receptor agonist, produces weight loss approaching ~12% in patients with T2D (51,52), which exceeds the ~10% weight loss achieved by semaglutide 2.4 mg in patients with T2D in the STEP 2 trial (53). Patients with T2D characteristically lose less weight in response to any intervention compared with nondiabetic individuals and, to date, all published data for tirzepatide involves patients with T2D. Predictably, tirzepatide would produce more weight loss in patients without diabetes and has the potential to meet the criteria for a second-generation drug for the general treatment of obesity once data become available in non-diabetic patients. Other promising medications under development include additional multiagonist GLP-1/glucagon/GIP peptides, long-acting amylin analogs (54,55), activin II receptor agonists that reduce body fat while increasing

muscle mass (56), and the combinations of GLP-1 receptor agonists with other satiety hormones such as amylin (55), PYY, and oxyntomodulin. Therefore, the future of obesity pharmacotherapy is bright, and we should anticipate the availability of additional second-generation medications. This will enhance the ability of clinicians to individualize treatment and more effectively treat-to-target. With any weight loss intervention, there is variability in the response and patients may not achieve target levels for reductions in body weight. Therefore, it is advantageous to have multiple second-generation medications, in addition to first generation drugs, in the armamentarium to enhance the ability of clinicians to identify effective treatment regimens in individual patients. Multiple available medications also allows for use of drug combinations. The regulation of body weight is complex and represents the combined action of multiple pathways. Drug combinations that target multiple pathways produce greater weight loss than when these drugs are used as single agents (57,58). Eventually, the combination of medications with different mechanisms of action will be possible as is common practice for other chronic diseases such as T2D and hypertension.

In summary, the advent of second-generation medications fully enables the treatment of ABCD as a chronic disease. The marked increment in efficacy over first-generation drugs permits active management of the % weight loss as a biomarker to targets associated with effective treatment and prevention of specific complications.

## Acknowledgments

**Financial Support:** Support is acknowledged from the National Institute of Diabetes Digestive and Kidney Diseases for the University of Alabama at Birmingham Diabetes Research Center (P30 DK079626).

## Additional Information

**Correspondence:** W. Timothy Garvey, MD, MACE, Department of Nutrition Sciences, The University of Alabama at Birmingham, 1675 University Blvd, Birmingham, AL 35294-3360, USA. E-mail: [garveyt@uab.edu](mailto:garveyt@uab.edu).

**Disclosures:** W.T.G. has served as a volunteer on advisory boards without receipt of financial compensation for Boehringer Ingelheim, JAZZ Pharmaceuticals, Novo Nordisk, and Pfizer; served on advisory boards for the nonprofit organizations the Milken Institute and the National Diabetes and Obesity Research Institute; served as site PI for multicentered clinical trials sponsored through his university; and funded by Eli Lilly, Epiteomee, Novo Nordisk, and Pfizer.

**Data Availability:** Data sharing is not applicable to this article as no data sets were generated or analyzed during the current study.

## References

- Kaplan LM, Golden A, Jinnett K, et al. Perceptions of barriers to effective obesity care: results from the national ACTION study. *Obesity (Silver Spring)*. 2018;26(1):61-69.
- Sumithran P, Proietto J. The defence of body weight: a physiological basis for weight regain after weight loss. *Clin Sci (Lond)*. 2013;124(4):231-241.
- Leibel RL, Rosenbaum M, Hirsch J. Changes in energy expenditure resulting from altered body weight. *N Engl J Med*. 1995;332(10):621-628.
- Cefalu WT, Bray GA, Home PD, et al. Advances in the science, treatment, and prevention of the disease of obesity: reflections from a diabetes care editors' expert forum. *Diabetes Care*. 2015;38(8):1567-1582.
- Garvey WT, Mechanick JI, Brett EM, et al; Reviewers of the AACE/ACE Obesity Clinical Practice Guidelines. American association of clinical endocrinologists and american college of endocrinology comprehensive clinical practice guidelines for medical care of patients with obesity. *Endocr Pract*. 2016;22(suppl 3):1-203.
- Mechanick JI, Garber AJ, Handelsman Y, Garvey WT. American association of clinical endocrinologists' position statement on obesity and obesity medicine. *Endocr Pract*. 2012;18(5):642-648.
- Garvey WT, Garber AJ, Mechanick JI, et al; The Aace Obesity Scientific Committee. American Association of Clinical Endocrinologists and American College of Endocrinology position statement on the 2014 advanced framework for a new diagnosis of obesity as a chronic disease. *Endocr Pract*. 2014;20(9):977-989.
- Garvey WT. New tools for weight-loss therapy enable a more robust medical model for obesity treatment: rationale for a complications-centric approach. *Endocr Pract*. 2013;19(5):864-874.
- Mechanick JI, Farkouh ME, Newman JD, Garvey WT. Cardiometabolic-based chronic disease, adiposity and dysglycemia drivers: JACC state-of-the-art review. *J Am Coll Cardiol*. 2020;75(5):525-538.
- Mechanick JI, Hurley DL, Garvey WT. Adiposity-based chronic disease as a new diagnostic term: the American association of clinical endocrinologists and American college of endocrinology position statement. *Endocr Pract*. 2017;23(3):372-378.
- Frühbeck G, Busetto L, Dicker D, et al. The ABCD of obesity: an EASO position statement on a diagnostic term with clinical and scientific implications. *Obes Facts*. 2019;12(2):131-136.
- Evert AB, Dennison M, Gardner CD, et al. Nutrition therapy for adults with diabetes or prediabetes: a consensus report. *Diabetes Care*. 2019;42(5):731-754.
- Wing RR, Lang W, Wadden TA, et al; Look AHEAD Research Group. Benefits of modest weight loss in improving cardiovascular risk factors in overweight and obese individuals with type 2 diabetes. *Diabetes Care*. 2011;34(7):1481-1486.
- Kuna ST, Reboussin DM, Borradaile KE, et al; Sleep AHEAD Research Group of the Look AHEAD Research Group. Long-term effect of weight loss on obstructive sleep apnea severity in obese patients with type 2 diabetes. *Sleep*. 2013;36(5):641-649A.
- Winslow DH, Bowden CH, DiDonato KP, McCullough PA. A randomized, double-blind, placebo-controlled study of an oral,

- extended-release formulation of phentermine/topiramate for the treatment of obstructive sleep apnea in obese adults. *Sleep*. 2012;35(11):1529-1539.
16. Lazo M, Solga SF, Horska A, et al; Fatty Liver Subgroup of the Look AHEAD Research Group. Effect of a 12-month intensive lifestyle intervention on hepatic steatosis in adults with type 2 diabetes. *Diabetes Care*. 2010;33(10):2156-2163.
  17. Mummadi RR, Kasturi KS, Chennareddygar S, Sood GK. Effect of bariatric surgery on nonalcoholic fatty liver disease: systematic review and meta-analysis. *Clin Gastroenterol Hepatol*. 2008;6(12):1396-1402.
  18. Adams TD, Gress RE, Smith SC, et al. Long-term mortality after gastric bypass surgery. *N Engl J Med*. 2007;357(8):753-761.
  19. Arterburn DE, Olsen MK, Smith VA, et al. Association between bariatric surgery and long-term survival. *JAMA*. 2015;313(1):62-70.
  20. Kwok CS, Pradhan A, Khan MA, et al. Bariatric surgery and its impact on cardiovascular disease and mortality: a systematic review and meta-analysis. *Int J Cardiol*. 2014;173(1):20-28.
  21. Look AHEAD Research Group, Gregg EW, Jakicic JM, Blackburn G, et al. Association of the magnitude of weight loss and changes in physical fitness with long-term cardiovascular disease outcomes in overweight or obese people with type 2 diabetes: a post-hoc analysis of the look AHEAD randomised clinical trial. *Lancet Diabetes Endocrinol*. 2016;4(11):913-921.
  22. Wilding JPH, Batterham RL, Calanna S, et al; STEP 1 Study Group. Once-weekly semaglutide in adults with overweight or obesity. *N Engl J Med*. 2021;384(11):989.
  23. Wadden TA, Bailey TS, Billings LK, et al; STEP 3 Investigators. Effect of subcutaneous semaglutide vs placebo as an adjunct to intensive behavioral therapy on body weight in adults with overweight or obesity: the STEP 3 randomized clinical trial. *JAMA*. 2021;325(14):1403-1413.
  24. Rubino D, Abrahamsson N, Davies M, et al; STEP 4 Investigators. Effect of continued weekly subcutaneous semaglutide vs placebo on weight loss maintenance in adults with overweight or obesity: the STEP 4 randomized clinical trial. *JAMA*. 2021;325(14):1414-1425.
  25. Torgerson JS, Hauptman J, Boldrin MN, Sjöström L. XENical in the prevention of diabetes in obese subjects (XENDOS) study: a randomized study of orlistat as an adjunct to lifestyle changes for the prevention of type 2 diabetes in obese patients. *Diabetes Care*. 2004;27(1):155-161.
  26. Allison DB, Gadde KM, Garvey WT, et al. Controlled-release phentermine/topiramate in severely obese adults: a randomized controlled trial (EQUIP). *Obesity (Silver Spring)*. 2012;20(2):330-342.
  27. Gadde KM, Allison DB, Ryan DH, et al. Effects of low-dose, controlled-release, phentermine plus topiramate combination on weight and associated comorbidities in overweight and obese adults (CONQUER): a randomised, placebo-controlled, phase 3 trial. *Lancet*. 2011;377(9774):1341-1352.
  28. Garvey WT, Ryan DH, Look M, et al. Two-year sustained weight loss and metabolic benefits with controlled-release phentermine/topiramate in obese and overweight adults (SEQUEL): a randomized, placebo-controlled, phase 3 extension study. *Am J Clin Nutr*. 2012;95(2):297-308.
  29. Greenway FL, Fujioka K, Plodkowski RA, et al; COR-I Study Group. Effect of naltrexone plus bupropion on weight loss in overweight and obese adults (COR-I): a multicentre, randomised, double-blind, placebo-controlled, phase 3 trial. *Lancet*. 2010;376(9741):595-605.
  30. Apovian CM, Aronne L, Rubino D, et al; COR-II Study Group. A randomized, phase 3 trial of naltrexone SR/bupropion SR on weight and obesity-related risk factors (COR-II). *Obesity (Silver Spring)*. 2013;21(5):935-943.
  31. Wadden TA, Foreyt JP, Foster GD, et al. Weight loss with naltrexone SR/bupropion SR combination therapy as an adjunct to behavior modification: the COR-BMOD trial. *Obesity (Silver Spring)*. 2011;19(1):110-120.
  32. Wadden TA, Hollander P, Klein S, et al; NN8022-1923 Investigators. Weight maintenance and additional weight loss with liraglutide after low-calorie-diet-induced weight loss: the SCALE Maintenance randomized study. *Int J Obes (Lond)*. 2013;37(11):1443-1451.
  33. Pi-Sunyer X, Astrup A, Fujioka K, et al; SCALE Obesity and Prediabetes NN8022-1839 Study Group. A randomized, controlled trial of 3.0 mg of liraglutide in weight management. *N Engl J Med*. 2015;373(1):11-22.
  34. le Roux CW, Astrup A, Fujioka K, et al; SCALE Obesity Prediabetes NN8022-1839 Study Group. 3 years of liraglutide versus placebo for type 2 diabetes risk reduction and weight management in individuals with prediabetes: a randomised, double-blind trial. *Lancet*. 2017;389(10077):1399-1409.
  35. Garvey WT, Batterham RL, Bhatta M, et al. Two-year effect of semaglutide 2.4 mg vs placebo in adults with overweight or obesity (STEP 5). Paper presented at: the 39th Annual Meeting of The Obesity Society (TOS) held at ObesityWeek®, virtual meeting; November 1–5, 2021.
  36. Rubino DM, Greenway FL, Khalid U, et al. Semaglutide 2.4 mg vs liraglutide 3.0 for weight management in overweight or obesity (STEP 8). Paper presented at: the 39th Annual Meeting of The Obesity Society (TOS) held at ObesityWeek®, virtual meeting; November 1–5, 2021.
  37. Kühnen P, Clément K, Wiegand S, et al. Proopiomelanocortin deficiency treated with a melanocortin-4 receptor agonist. *N Engl J Med*. 2016;375(3):240-246.
  38. Clément K, Biebermann H, Farooqi IS, et al. MC4R agonism promotes durable weight loss in patients with leptin receptor deficiency. *Nat Med*. 2018;24(5):551-555.
  39. Collet TH, Dubern B, Mokrosinski J, et al. Evaluation of a melanocortin-4 receptor (MC4R) agonist (Setmelanotide) in MC4R deficiency. *Mol Metab*. 2017;6(10):1321-1329.
  40. American Diabetes Association. Standards of medical care in diabetes—2021. 6. Glycemic targets. *Diabetes Care*. 2021;44(suppl 1):S73-S84.
  41. Garber AJ, Handelsman Y, Grunberger G, et al. Consensus statement by the American Association of Clinical Endocrinologists and American College of Endocrinology on the comprehensive type 2 diabetes management algorithm—2020 executive summary. *Endocr Pract*. 2020;26(1):107-139.
  42. Arnett DK, Blumenthal RS, Albert MA, et al. 2019 ACC/AHA guideline on the primary prevention of cardiovascular disease: a report of the American College of Cardiology/American Heart Association Task Force on Clinical Practice Guidelines. *J Am Coll Cardiol*. 2019;74(10):e177-e232.
  43. Marso SP, Daniels GH, Brown-Frandsen K, et al; LEADER Steering Committee; LEADER Trial Investigators. Liraglutide



- and cardiovascular outcomes in type 2 diabetes. *N Engl J Med*. 2016;375(4):311-322.
44. Marso SP, Bain SC, Consoli A, et al; SUSTAIN-6 Investigators. Semaglutide and cardiovascular outcomes in patients with type 2 diabetes. *N Engl J Med*. 2016;375(19):1834-1844.
45. Ryan DH, Lingvay I, Colhoun HM, et al. Semaglutide effects on cardiovascular outcomes in people with overweight or obesity (SELECT) rationale and design. *Am Heart J*. 2020;229:61-69.
46. Sharma AM, Kushner RF. A proposed clinical staging system for obesity. *Int J Obes (Lond)*. 2009;33(3):289-295.
47. Guo F, Moellering DR, Garvey WT. The progression of cardiometabolic disease: validation of a new cardiometabolic disease staging system applicable to obesity. *Obesity (Silver Spring)*. 2014;22(1):110-118.
48. Wilkinson L, Yi N, Mehta T, Judd S, Garvey WT. Development and validation of a model for predicting incident type 2 diabetes using quantitative clinical data and a Bayesian logistic model: a nationwide cohort and modeling study. *PLoS Med*. 2020;17(8):e1003232.
49. Garvey WT, Mechanick JL. Proposal for a scientifically correct and medically actionable disease classification system (ICD) for obesity. *Obesity (Silver Spring)*. 2020;28(3):484-492.
50. Hebebrand J, Holm JC, Woodward E, et al. A proposal of the European Association for the Study of Obesity to improve the ICD-11 diagnostic criteria for obesity based on the three dimensions etiology, degree of adiposity and health risk. *Obes Facts*. 2017;10(4):284-307.
51. Rosenstock J, Wysham C, Frías JP, et al. Efficacy and safety of a novel dual GIP and GLP-1 receptor agonist tirzepatide in patients with type 2 diabetes (SURPASS-1): a double-blind, randomised, phase 3 trial. *Lancet*. 2021;398(10295):143-155.
52. Frías JP, Davies MJ, Rosenstock J, et al; SURPASS-2 Investigators. Tirzepatide versus semaglutide once weekly in patients with type 2 diabetes. *N Engl J Med*. 2021;385(6):503-515.
53. Davies M, Færch L, Jeppesen OK, et al; STEP 2 Study Group. Semaglutide 2.4 mg once a week in adults with overweight or obesity, and type 2 diabetes (STEP 2): a randomised, double-blind, double-dummy, placebo-controlled, phase 3 trial. *Lancet*. 2021;397(10278):971-984.
54. Batterham RL, Erichsen L, Francisco AM, et al. Efficacy and safety of AM833 for weight loss: a dose-finding trial in adults with overweight/obesity. Paper presented at: European Congress on Obesity, virtual meeting; May 10–13, 2021.
55. Enebo LB, Berthelsen KK, Kankam M, et al. Safety, tolerability, pharmacokinetics, and pharmacodynamics of concomitant administration of multiple doses of cagrilintide with semaglutide 2.4 mg for weight management: a randomised, controlled, phase 1b trial. *Lancet*. 2021;397(10286):1736-1748.
56. Heymsfield SB, Coleman LA, Miller R, et al. Effect of bimagrumab vs placebo on body fat mass among adults with type 2 diabetes and obesity: a phase 2 randomized clinical trial. *JAMA Netw Open*. 2021;4(1):e2033457.
57. Smith SR, Garvey WT, Greenway FL, et al. Coadministration of lorcaserin and phentermine for weight management: a 12-week, randomized, pilot safety study. *Obesity (Silver Spring)*. 2017;25(5):857-865.
58. Aronne LJ, Wadden TA, Peterson C, Winslow D, Odeh S, Gadde KM. Evaluation of phentermine and topiramate versus phentermine/topiramate extended-release in obese adults. *Obesity (Silver Spring)*. 2013;21(11):2163-2171.
